# Supplementary material for: Analysis of translating mitoribosome reveals functional characteristics of translation in mitochondria of fungi
Source: PubMed Central journal article supplement (PMC7560712; doi:10.1038/s41467-020-18830-w), 2020-10-14
Supplement: 41467_2020_18830_MOESM1_ESM.pdf [file 41467_2020_18830_MOESM1_ESM.pdf]

1 **Supplementary Information**

2 **Analysis of translating mitoribosome reveals functional**  
3 **characteristics of protein synthesis in mitochondria of fungi**

4  
5 Yuzuru Itoh<sup>1,2†</sup>, Andreas Naschberger<sup>1†</sup>, Narges Mortezaei<sup>1†</sup>, Johannes Herrmann<sup>3</sup>  
6 and Alexey Amunts<sup>1,2\*</sup>  
7

8 <sup>1</sup>Science for Life Laboratory, Department of Biochemistry and Biophysics, Stockholm  
9 University, 17165 Solna, Sweden

10 <sup>2</sup>Department of Medical Biochemistry and Biophysics, Karolinska Institutet, 17165  
11 Solna, Sweden

12 <sup>3</sup>Cell Biology, University of Kaiserslautern, Erwin-Schrödinger-Straße 13, 67663 Kaiserslautern,  
13 Germany

14 † These authors contributed equally to this work.

15  
16  
17 \*Correspondence and request for material should be addressed to [amunts@scilifelab.se](mailto:amunts@scilifelab.se)  
18  
19

20 **This file includes:**

21 Supplementary Fig. 1 to 18

22 Supplementary Tables 1 to 3

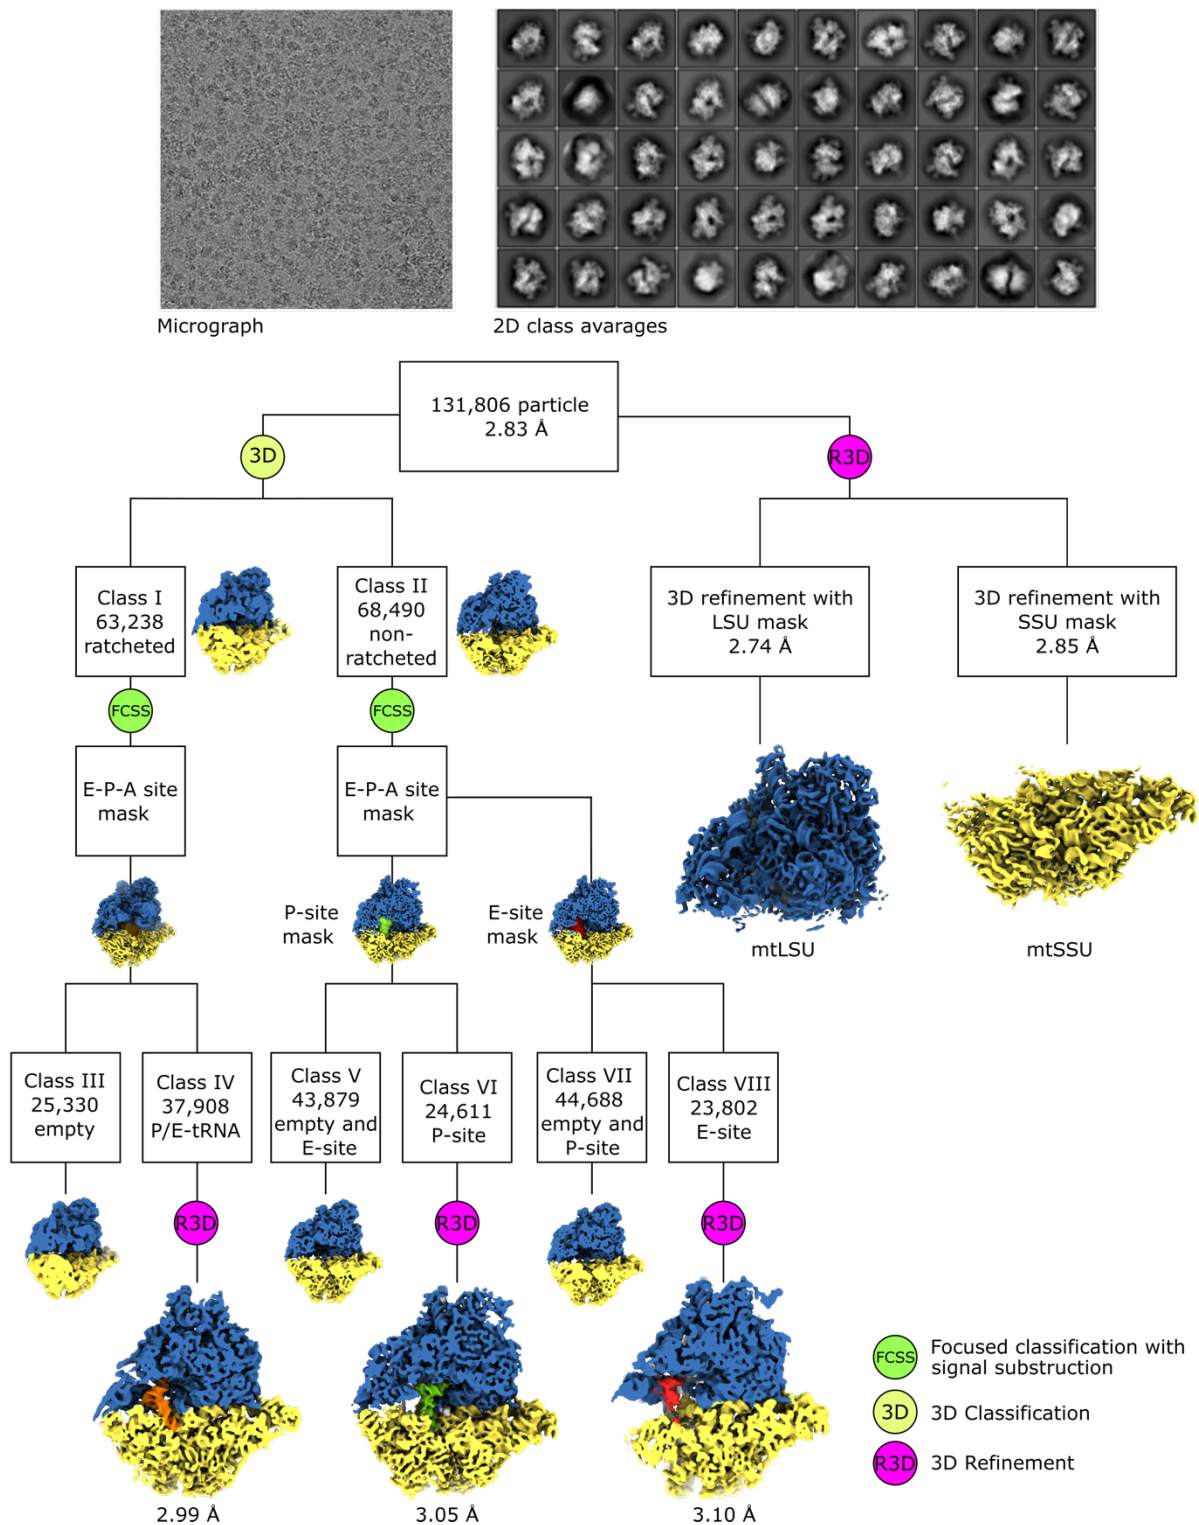

23

24 **Supplementary Fig. 1: Cryo-EM data collection and processing scheme.** Representative  
 25 micrograph and 2D class averages. Data refinement protocol and classification scheme for  
 26 mtLSU, mtSSU and monosome in three tRNA bound states.

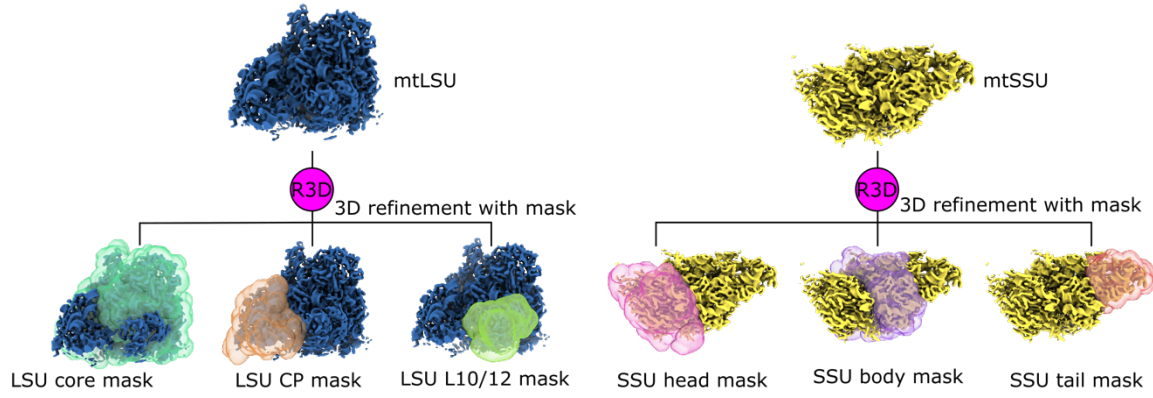

27

28 **Supplementary Fig. 2: Masked refinement of mitoribosomal subunits.** Masks for mtLSU  
29 core, CP, L7/12 stalk; mtSSU head, body, tail were used to improve the density locally.

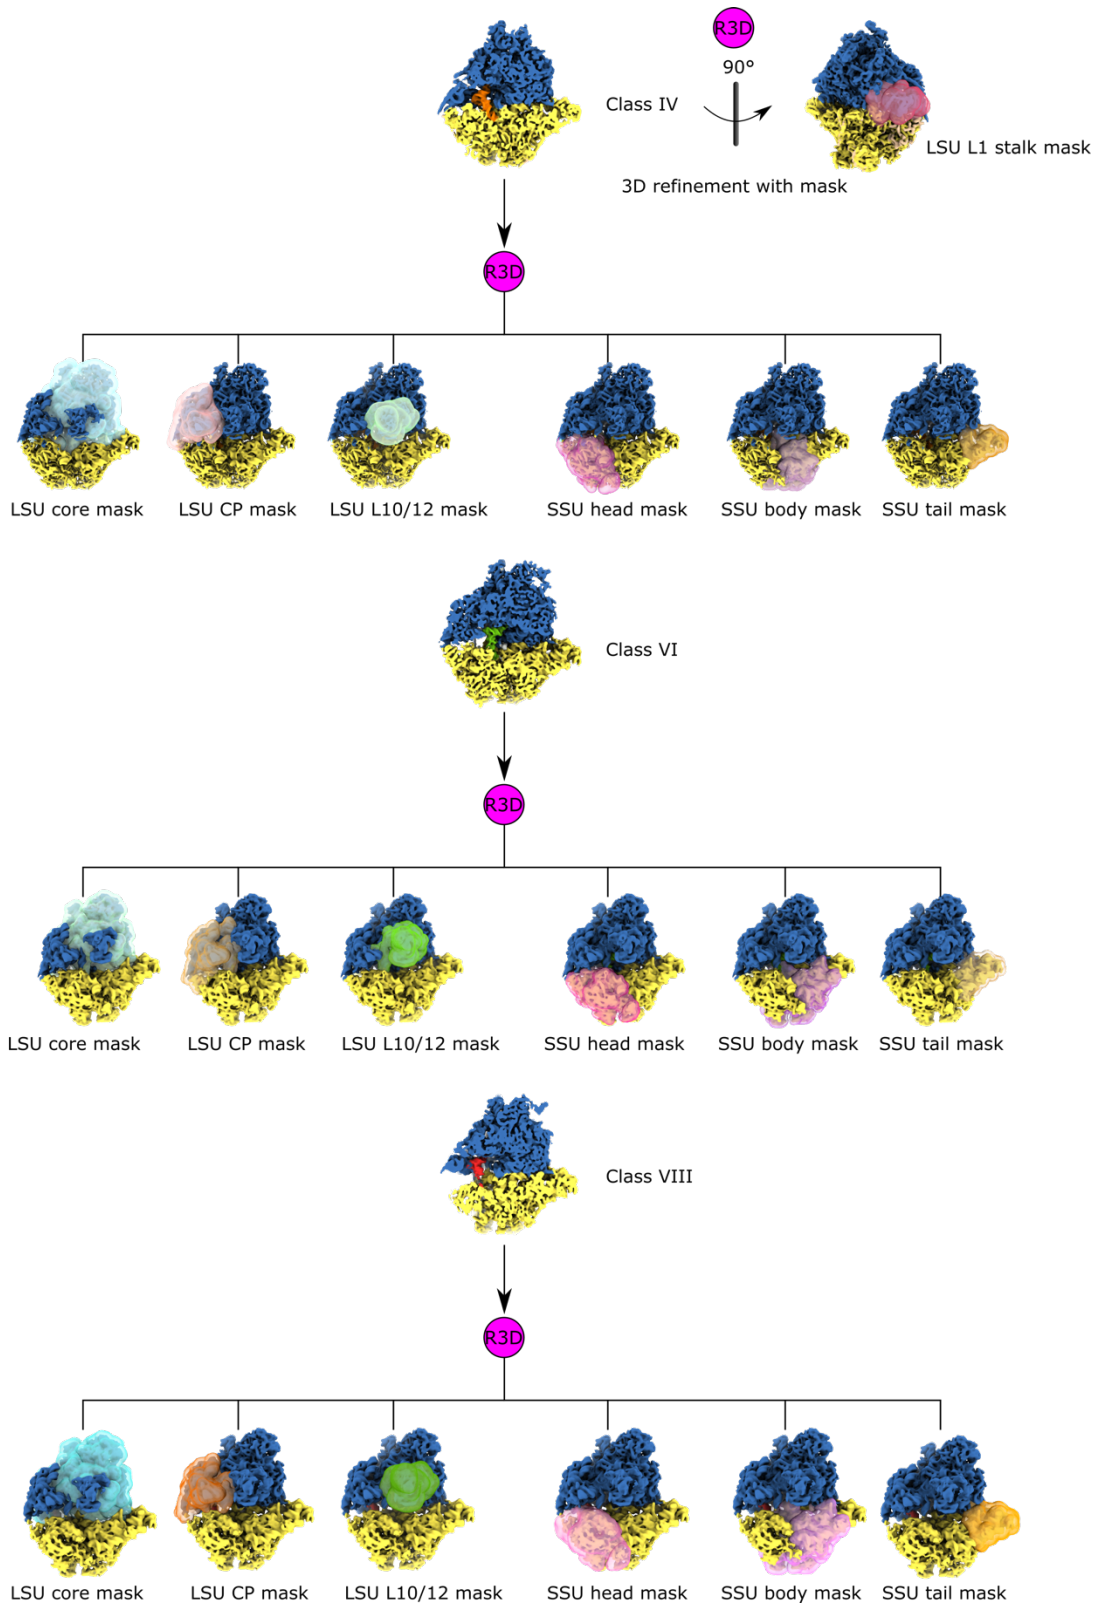

30

31 **Supplementary Fig. 3: Masking refinement of the mitoribosomes in tRNA bound states.**

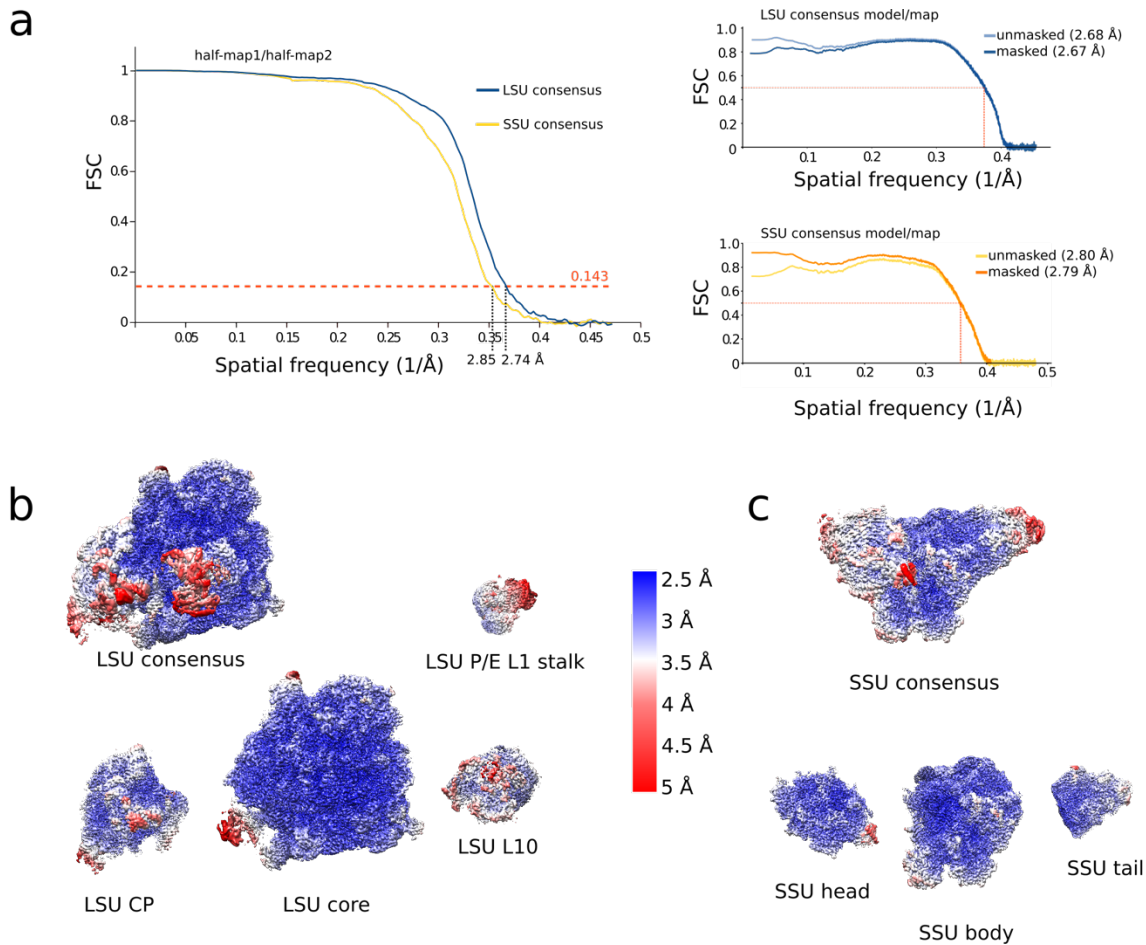

32

33 **Supplementary Fig. 4: Overall and local resolution estimations of mitoribosomal subunits.a**  
 34 Fourier Shell Correlation (FSC) curves of half-maps and map-to-model are shown. Cut-off values  
 35 of 0.143 (gold-standard) and 0.5 (model-to-map) are indicated and the corresponding resolution  
 36 estimates are shown **b** mtLSU cryo-EM maps viewed according to local resolution. **c** mtSSU  
 37 cryo-EM maps viewed according to local resolution.

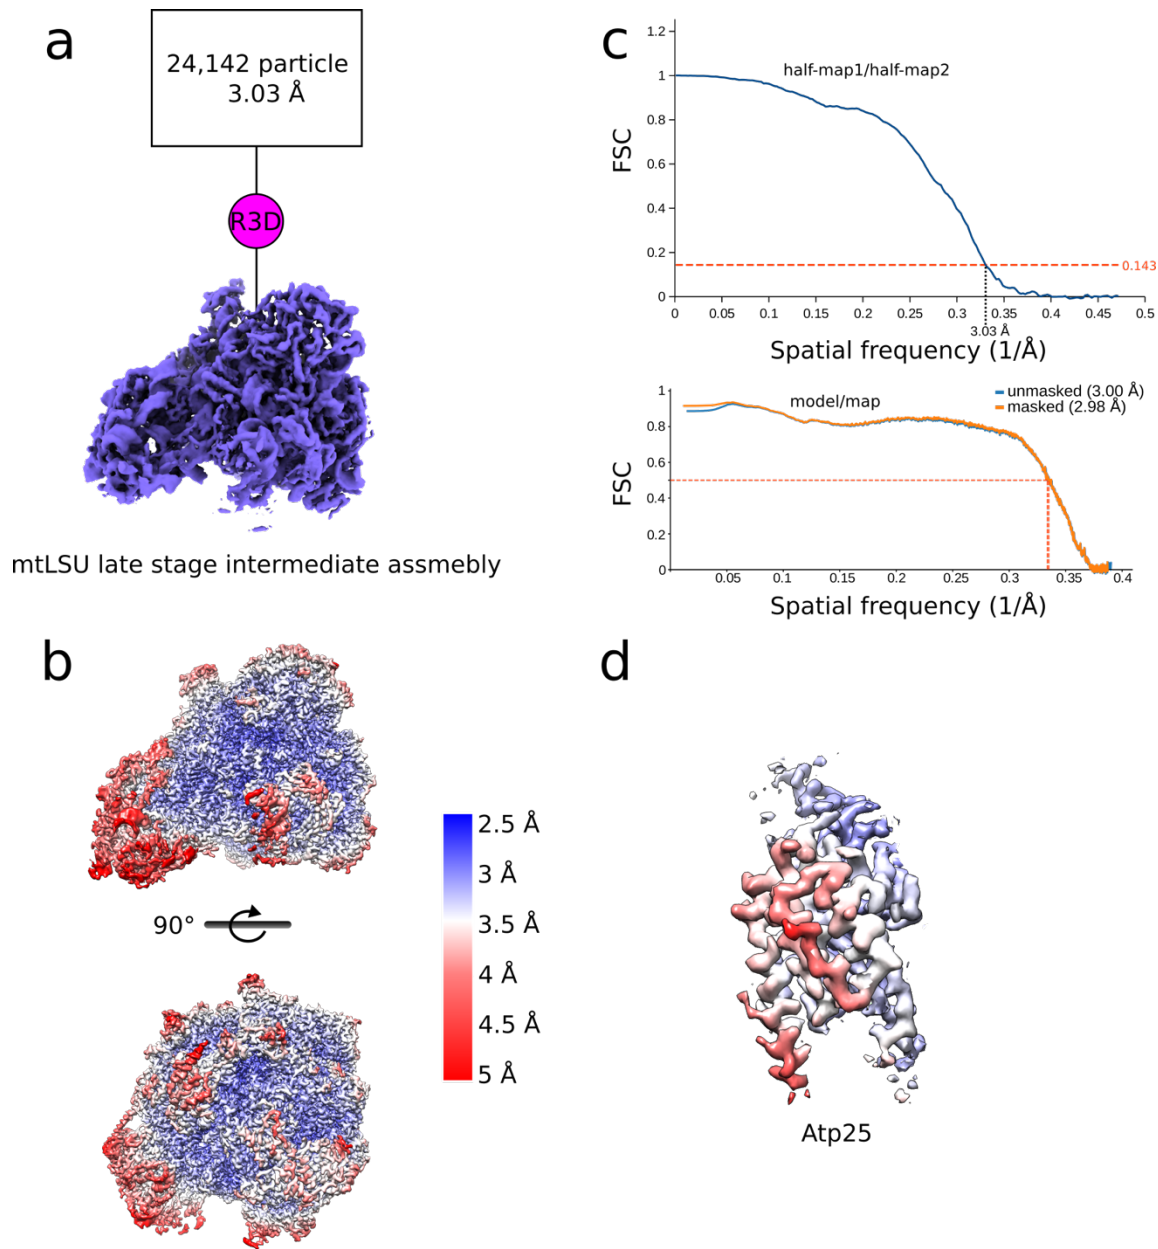

38

39 **Supplementary Fig. 5: Data processing and overall and local resolution estimations of**  
 40 **mtLSU-Atp25 assembly intermediate.** **a** Processing scheme. **b** Fourier Shell Correlation (FSC)  
 41 curves for half-maps and map-to-model are shown. Cut-off values are indicated and resolution  
 42 estimates are shown. **c** mtLSU-Atp25 assembly intermediate cryo-EM maps colored according to  
 43 local resolution. **d** Zoomed in map for Atp25 colored by local resolution.

44

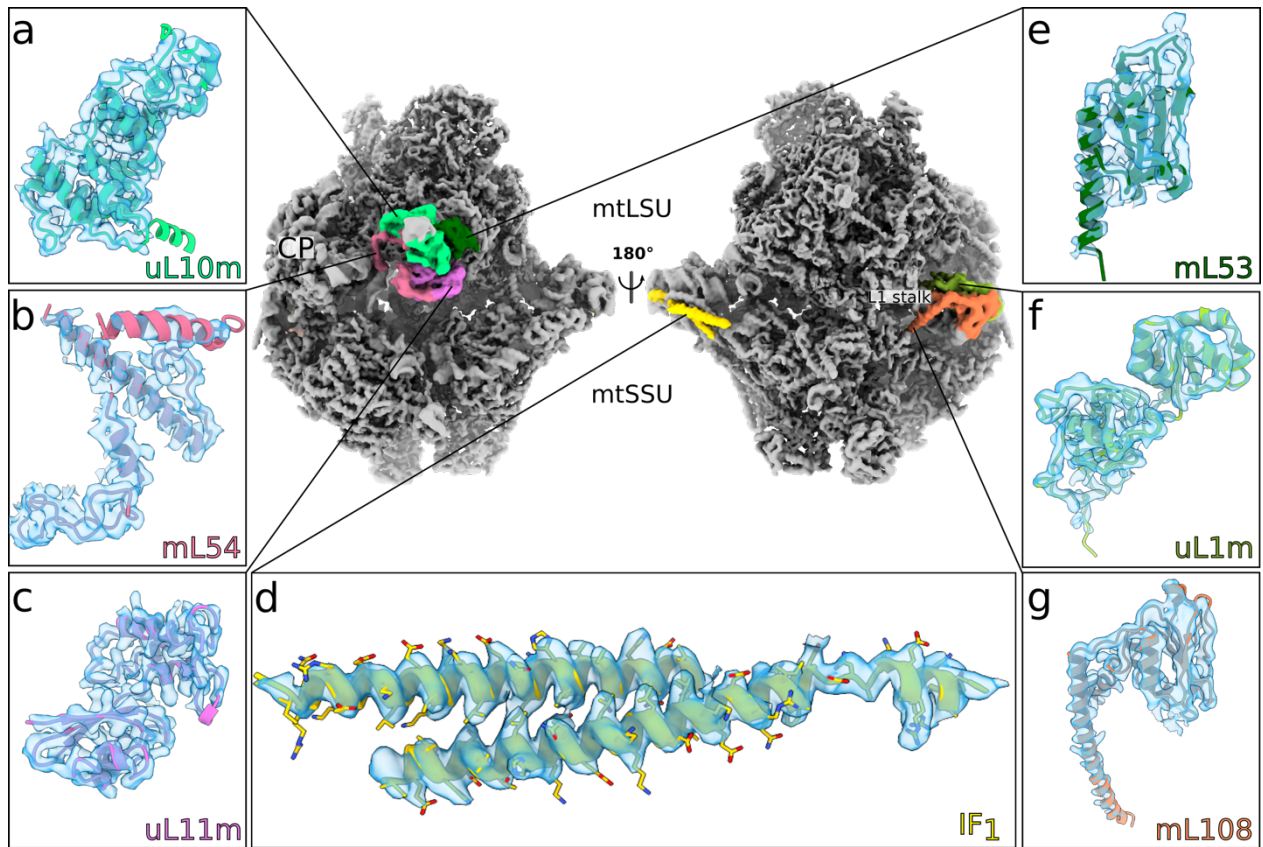

45

46 **Supplementary Fig. 6. Cryo-EM reconstruction and newly modelled proteins.** Two views of  
 47 a composite cryo-EM map with newly identified proteins colored. The close-up views show the  
 48 newly modeled proteins with their corresponding density map: **a** uL10m. **b** mL54. **c** uL11m. **d**  
 49 IF<sub>1</sub>. **e** mL53. **f** uL1m. **g** mL108.

50

51





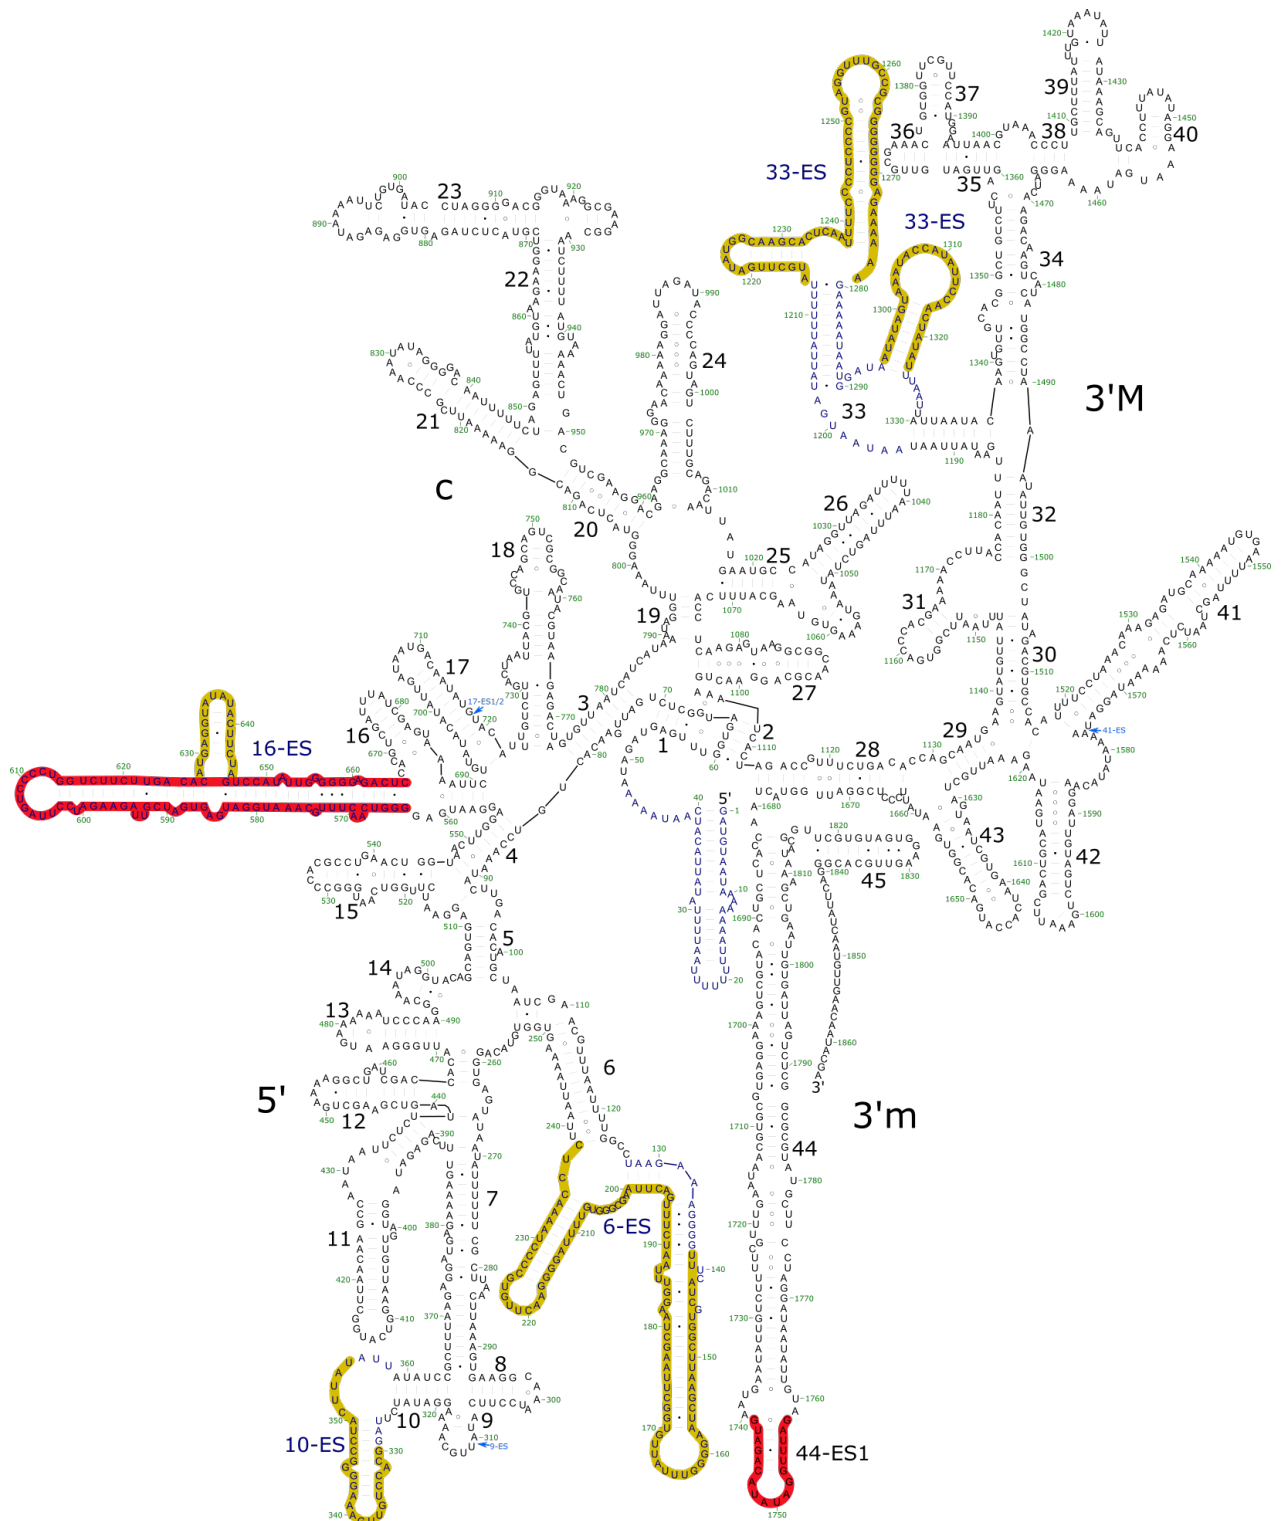

56

57 **Supplementary Fig. 8: Structure-based secondary structure diagram of the mtLSU rRNA.**  
 58 Expansion segments shared between *N. crassa* and *S. cerevisiae* are highlighted with red, specific  
 59 expansion segments are highlighted with yellow. Those present in *S. cerevisiae* only are indicated  
 60 by light blue arrows. rRNA domains are labeled with roman numerals.

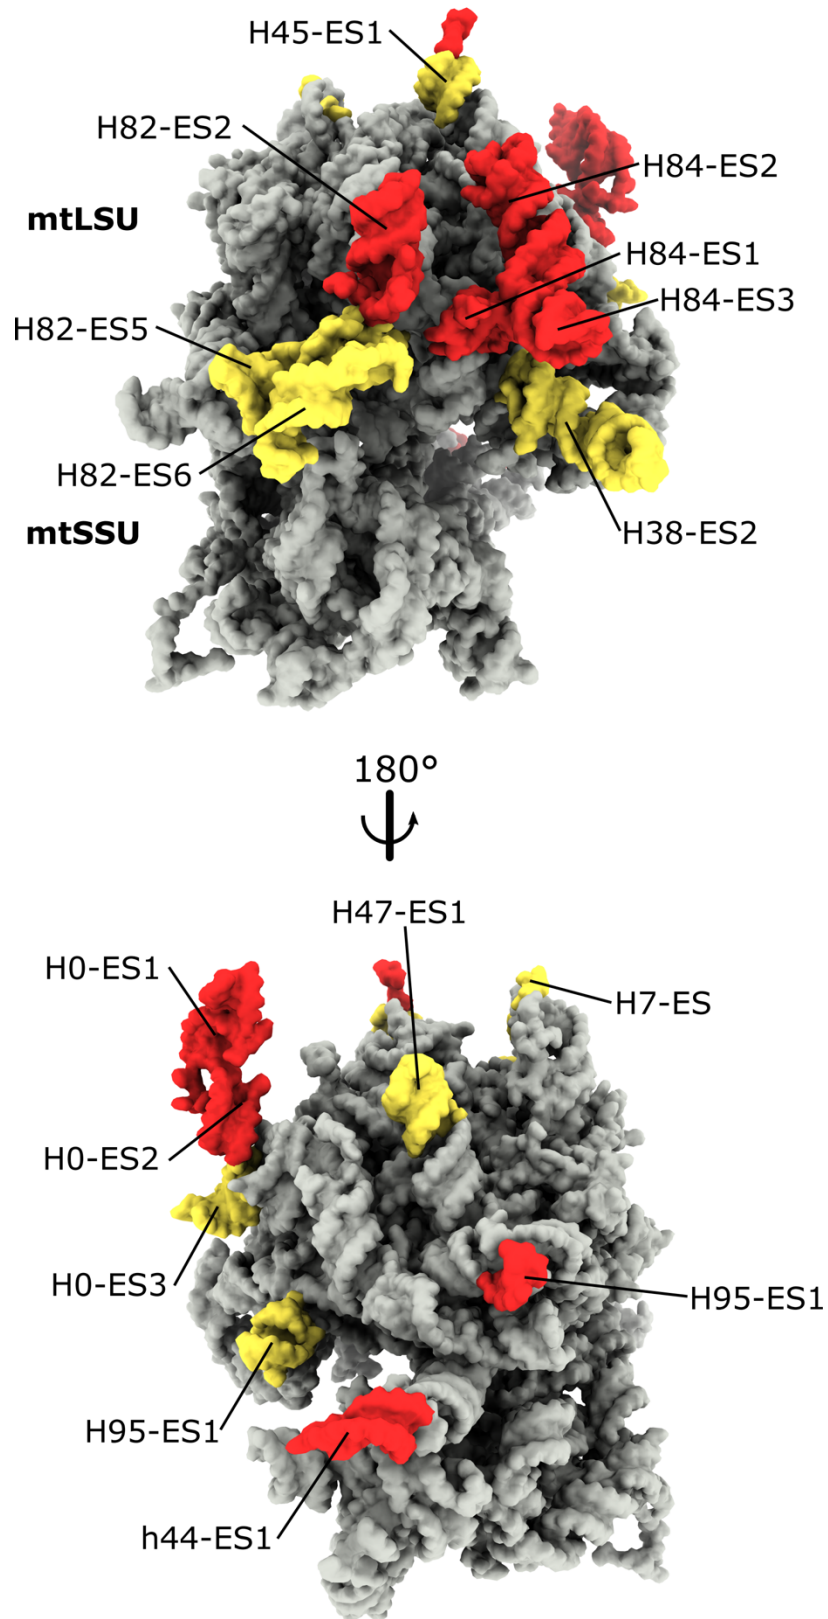

61

62 **Supplementary Fig. 9: 3D view of the rRNA of mtLSU and mtSSU.** The conserved rRNA is  
 63 in gray. ESs shared with *S. cerevisiae* are in red, and specific ESs in yellow.

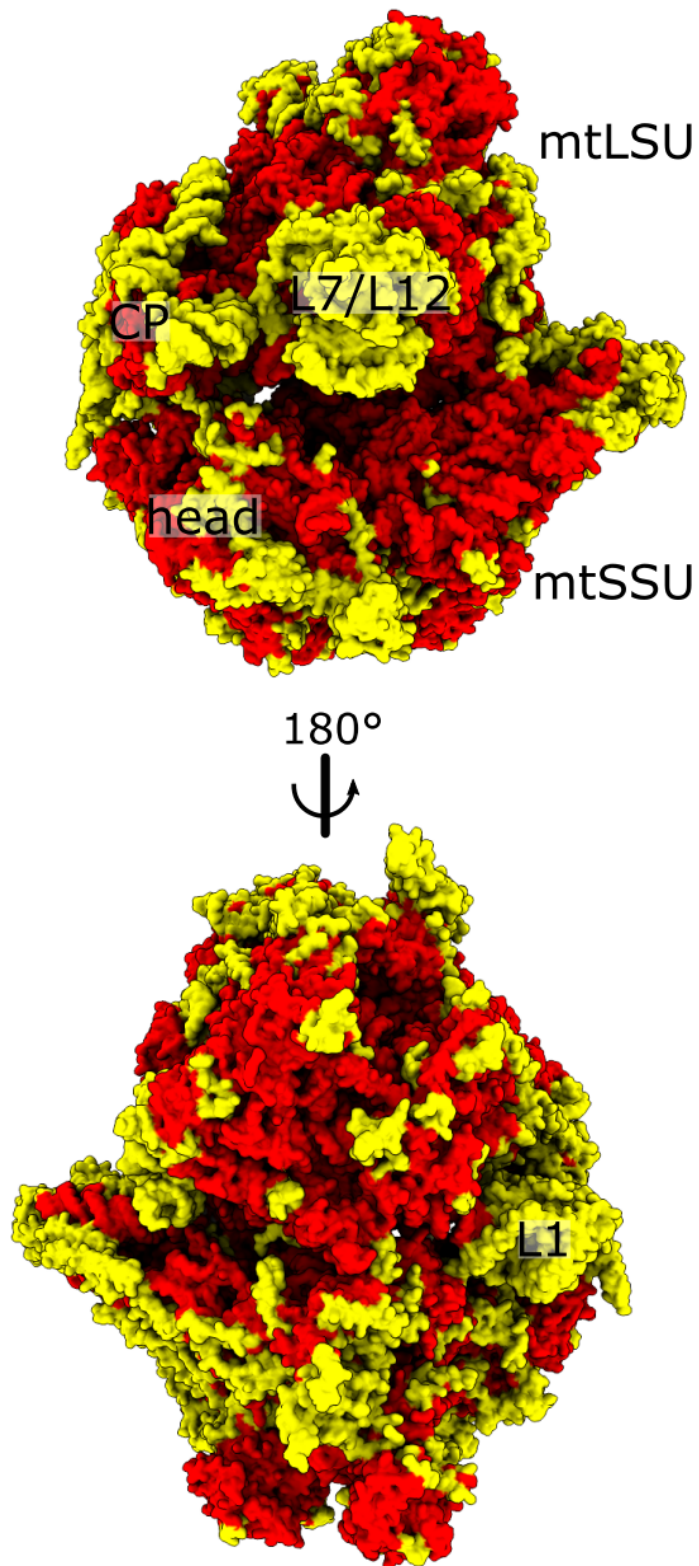

64  
65 **Supplementary Fig. 10: Improvements in the fungal mitoribosomal model.** The newly  
66 modeled and improved features in the current structure (yellow) compared with the previous  
67 model (red) of the *S. cerevisiae* mitoribosome (PDB ID: [5MRC](#)).

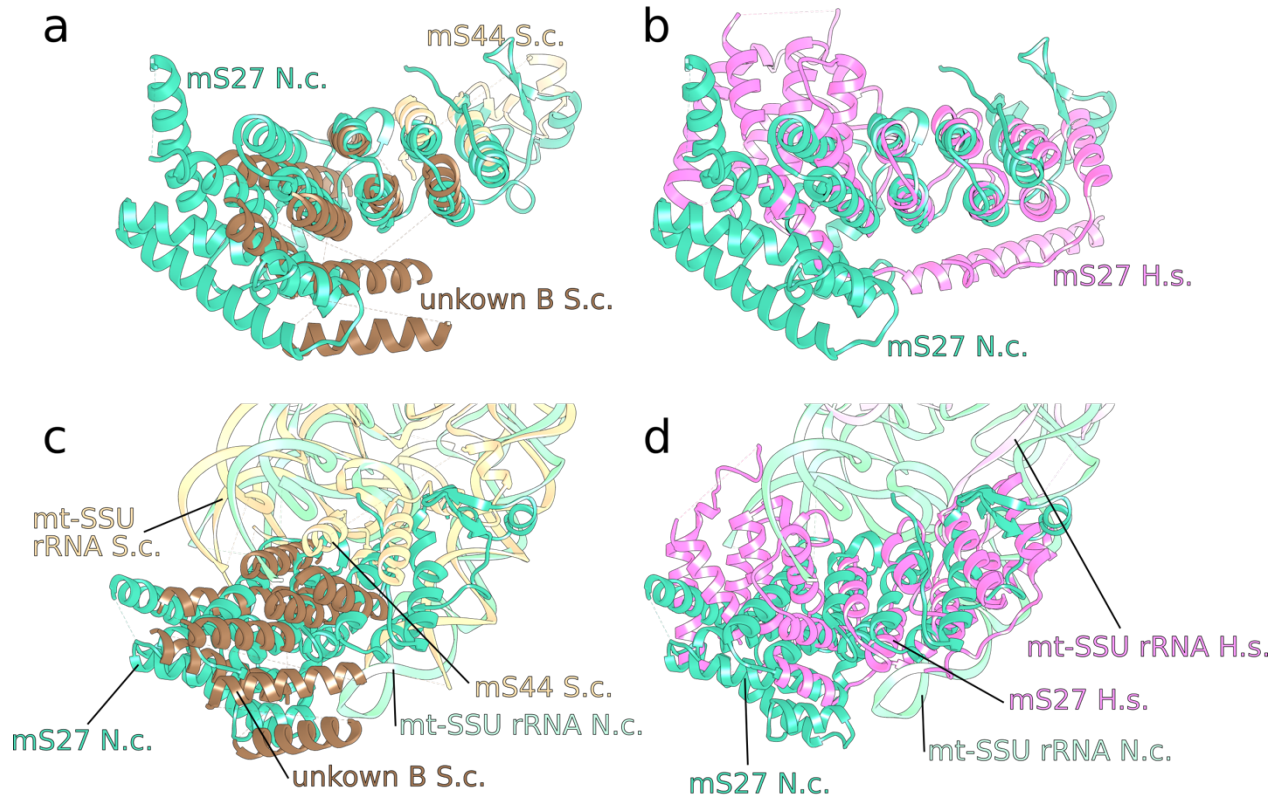

69 **Supplementary Fig. 11: Superposition of mS27 orthologs.** **a** *N. crassa* and *S. cerevisiae* mS27  
70 is superimposed (previously assigned as mS44, ‘unknown B’). **b** *N. crassa* and *H. sapiens* mS27  
71 is superimposed, showing similar fold. **c** Superposition based on mtSSU rRNA suggests the same  
72 location form mS27 from *N. crassa* and *S. cerevisiae*. **d** Superposition based on mtSSU rRNA  
73 suggests the same location form mS27 from *N. crassa* and *H. sapiens*.

Current work

PDB ID: 5MRC

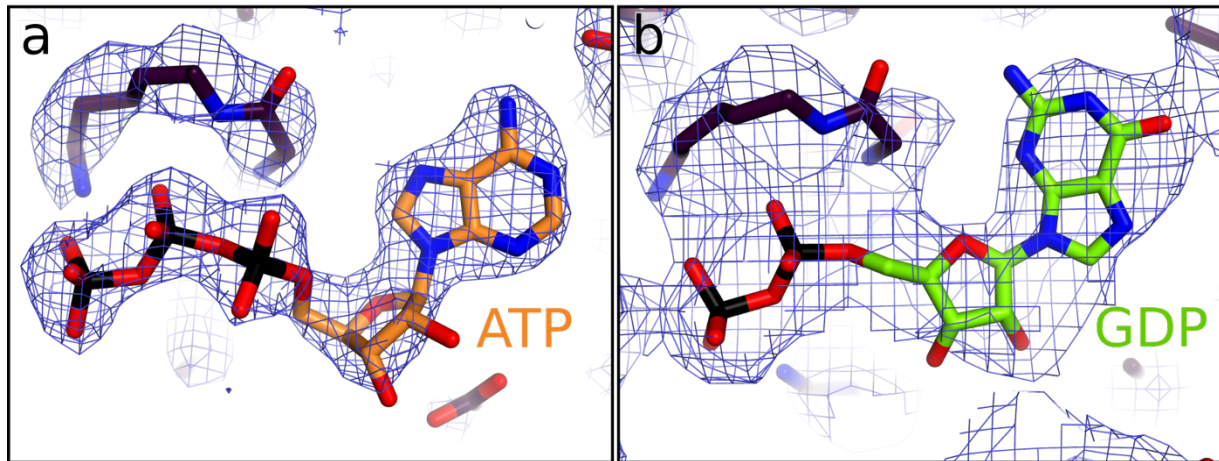

74

75 **Supplementary Fig. 12: Comparison of the nucleotide density for mS29 between the current**  
76 **model of *N. crassa* and previous work. a** The density for ATP bound to mS29 in the current  
77 work with the corresponding model **b** For comparison the density of the previously modeled  
78 GDP in *S. cerevisiae* is shown.

79

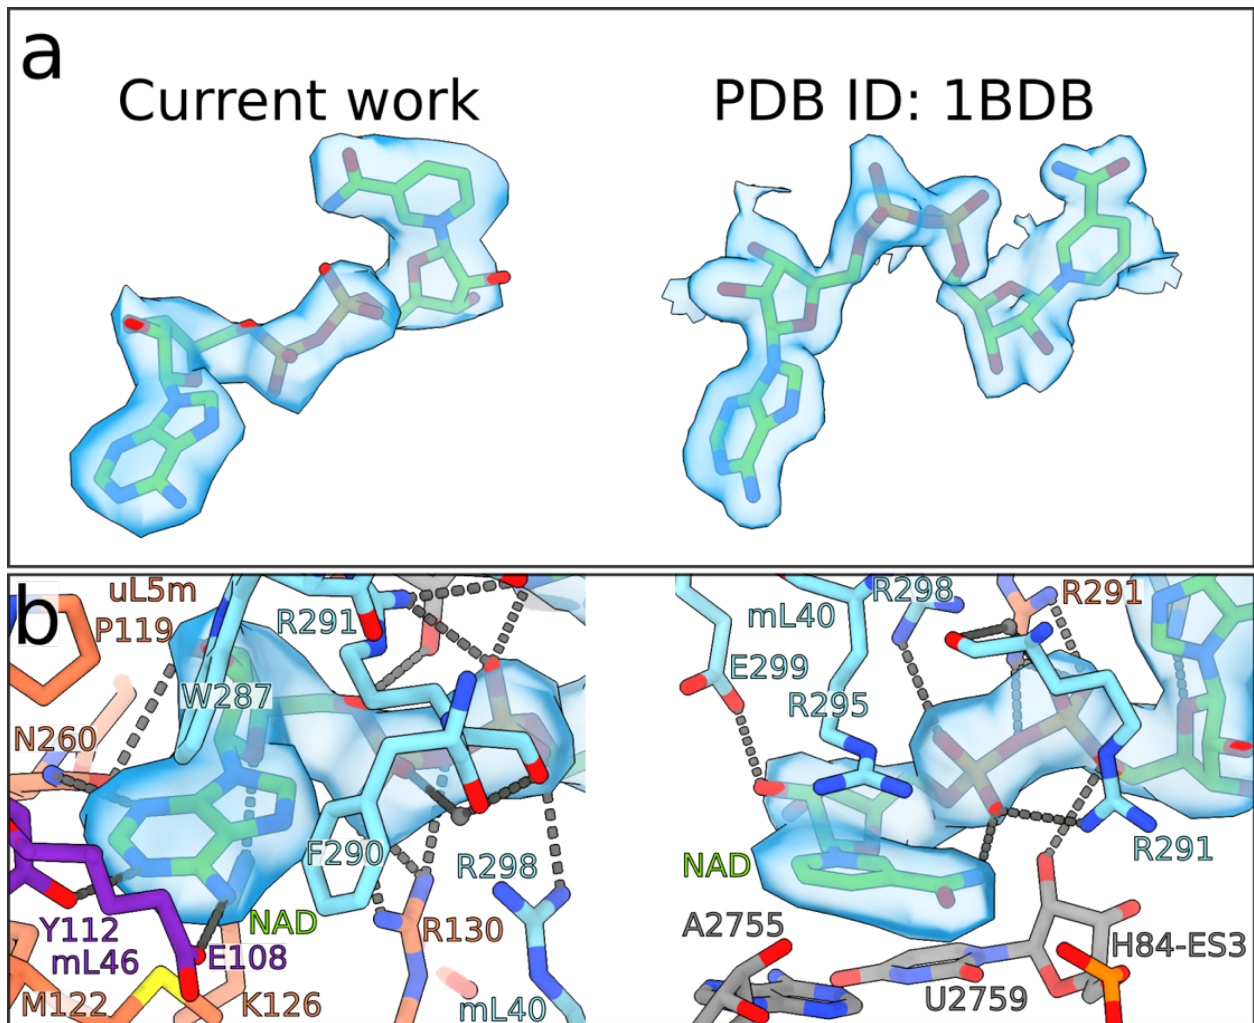

80  
81

82 **Supplementary Fig. 13: Density map and interactions of the NAD binding pocket in the CP**  
 83 **of *N. crassa*.** **a** Comparison of the density in the current work with 2 Å resolution crystal  
 84 structure (PDB ID: [1BDB](#)) confirms the correct assignment of NAD in the model. Both studies  
 85 show the nicotinic acid in syn-conformation. **b** Interactions formed by NAD with uL5, mL40 and  
 86 H84-ES3 rRNA showed from two opposite views. One view is centered on the adenine ring and  
 87 the other view around the nicotinic acid. Hydrogen bonds and charged interactions are indicated  
 88 by black dashed lines. Residues and nucleotides are colored and labeled correspondingly.

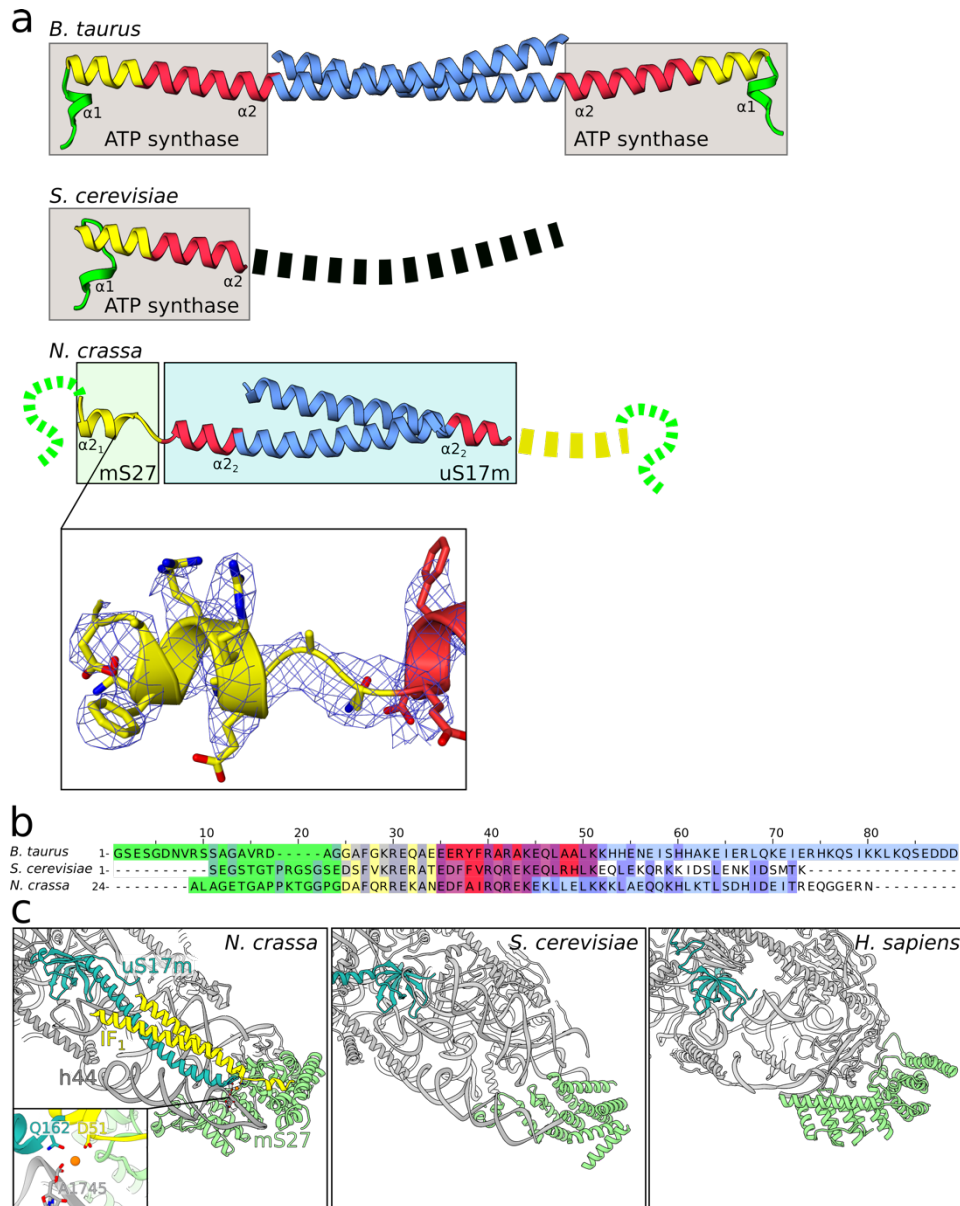

89

90 **Supplementary Fig. 14: IF<sub>1</sub> topology, structure, binding and conservation.** **a** Comparison with  
 91 *Bos taurus* (generated from PDB IDs: [1GMJ](#)<sup>1</sup> and [4TSF](#)<sup>2</sup>) and *S. cerevisiae* (PDB ID: [3ZIA](#)).  
 92 Density map with model is shown to illustrate the quality of the data in this region. The  
 93 mitochondrion and F<sub>1</sub>-ATPase binding parts are indicated with boxes. For *N. crassa*, the disordered  
 94 N-terminal region (residues 24-39), the short helix  $\alpha_{2_1}$  with a loop (residues 40-49), the longer  
 95 helix  $\alpha_{2_2}$  outside the dimerization part (residues 50-58), and  $\alpha_{2_2}$  within the dimerization part  
 96 (residues 59-88) are green, yellow, red, and blue, respectively. Corresponding residues are colored  
 97 accordingly in *B. taurus* and *S. cerevisiae*, where  $\alpha_1$  is located in the N-terminal region and  $\alpha_{2_1}$   
 98 and  $\alpha_{2_2}$  are a continuous helix  $\alpha_2$ . **b** Structure-based sequence alignment, colored as in **a**. The  
 99 mitochondria targeting sequence is included in the residue numbering for *N. crassa*. **c** Structure of  
 100 the IF<sub>1</sub>-binding site of *N. crassa* mtSSU and the corresponding regions from *S. cerevisiae* and *H.*  
 101 *sapiens*. IF<sub>1</sub>, uS17m, and mS27 are indicated. The IF<sub>1</sub> homodimer forms a helical bundle with the  
 102 specific C-terminal extension of uS17m. The Mg-ion mediated bridge is shown in a zoom-in  
 103 window.

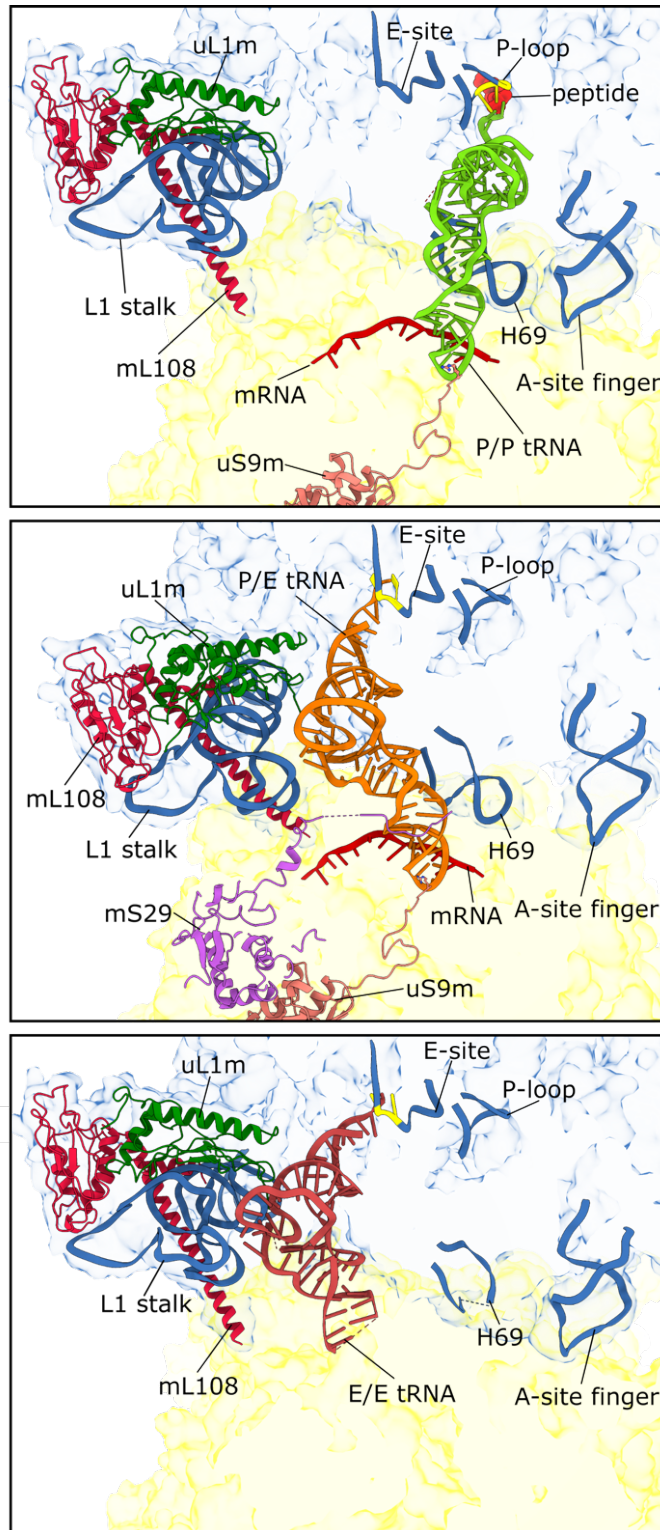

104

105 **Supplementary Fig. 15: The L1-stalk and translocation of tRNA.** The three states are  
 106 structurally aligned on mtLSU. Transparent surfaces of mtLSU and mtSSU are colored in blue  
 107 and yellow respectively. Cartoon representations of involved parts are shown and labeled. The  
 108 P/P-tRNA state with the tRNA colored in green (top). The P/E-tRNA state with the tRNA  
 109 colored in orange (middle). The E/E-tRNA state with the tRNA colored in red (bottom).



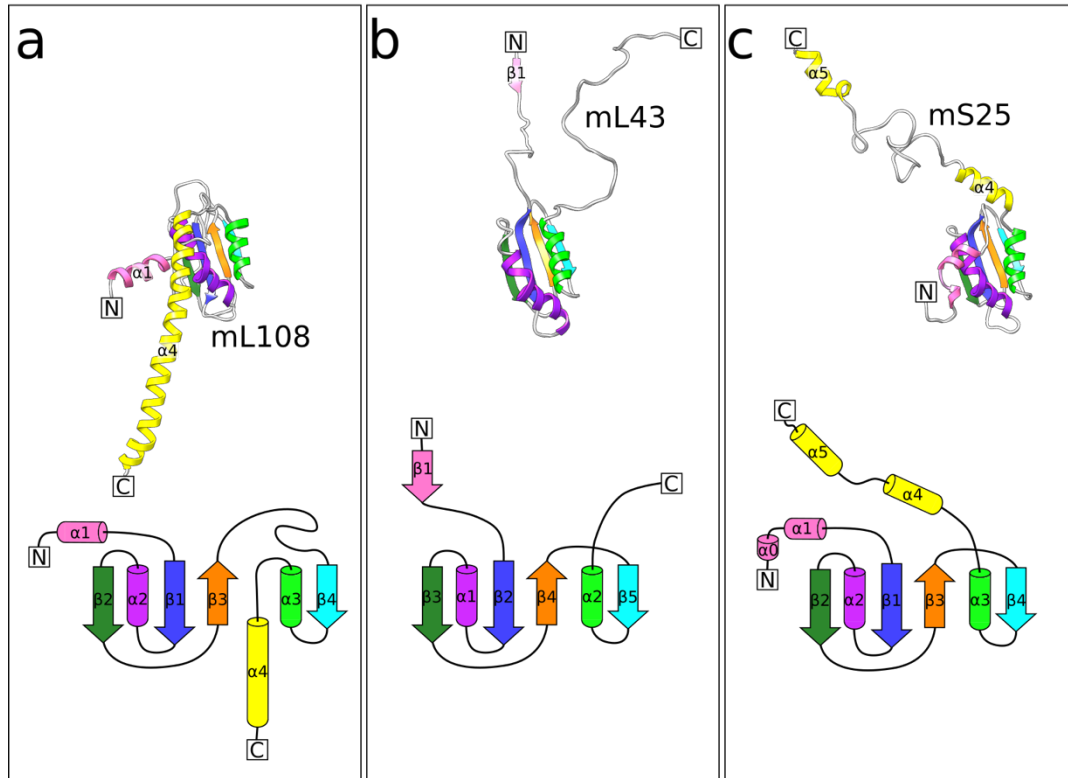

110

111 **Supplementary Fig 16: Topology of mL108, mL43, and mS25.** Three dimensional models and  
 112 topology of the homologous proteins with secondary structure elements colored, featuring their  
 113 structural similarity. **a** mL108 of *N. crassa*. **b** mL43 of *N. crassa* and **c** mS25 of *Sus scrofa* (PDB  
 114 ID: [5AJ4](#)).

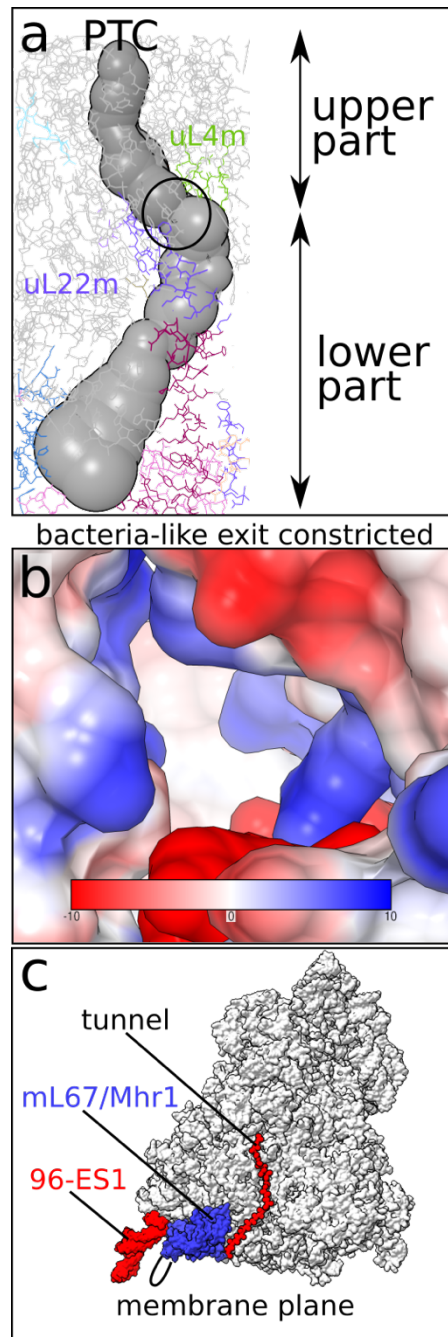

115

116 **Supplementary Fig. 17: Analysis of potential tunnel exit sites.** **a** The calculated tunnel showing  
 117 the partition of the tunnel in to the upper and lower parts. The constriction site (circled) is  
 118 surrounded by uL22m and uL4m. **b** The view of the bacteria-like exit site in surface representation  
 119 colored by electrostatic Coulomb potential (kcal/mol\*e) shows constriction with positively charged  
 120 protein environment. **c** The polypeptide path in the *N. crassa* mitoribosome. The flexible elements  
 121 96-ES1 and mL67/Mhr1 extension around the exit are indicated.

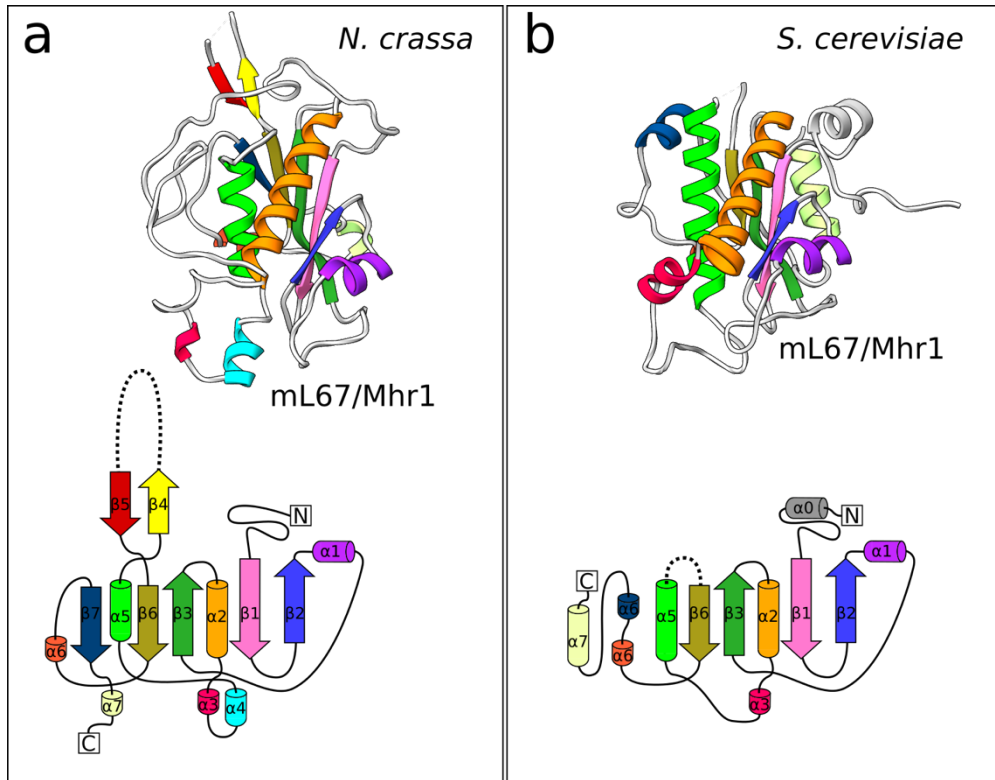

122

123

124

125

126

127

**Supplementary Fig. 18: Structure and topology of mL67/Mhr1.** **a** Three dimensional model and topology of *N. crassa* mL67/Mhr1 with secondary structure elements colored. The specific extension between  $\beta$ -strands 4 and 5 is indicated as dashed line. **b** Three dimensional model and topology of *S. cerevisiae* mL67/Mhr1 following the same color scheme in panel **a**.

128 **Supplementary Table 1. Data and model statistics.**

| Data collection                                                                                                                          | mtLSU                                | mtSSU                          | Monosome with E-site tRNA                      | Monosome with P-site tRNA                      | Monosome with tRNA in P/E state                    | Late stage intermediate mtLSU (Atp25) |
|------------------------------------------------------------------------------------------------------------------------------------------|--------------------------------------|--------------------------------|------------------------------------------------|------------------------------------------------|----------------------------------------------------|---------------------------------------|
| Microscope                                                                                                                               | Titan Krios                          | Titan Krios                    | Titan Krios                                    | Titan Krios                                    | Titan Krios                                        | Titan Krios                           |
| Detector                                                                                                                                 | K2 Summit                            | K2 Summit                      | K2 Summit                                      | K2 Summit                                      | K2 Summit                                          | K2 Summit                             |
| Magnification                                                                                                                            | 130,000                              | 130,000                        | 130,000                                        | 130,000                                        | 130,000                                            | 130,000                               |
| Voltage [kV]                                                                                                                             | 300                                  | 300                            | 300                                            | 300                                            | 300                                                | 300                                   |
| Total electron dose [ $e^-/\text{Å}^2$ ]                                                                                                 | 35                                   | 35                             | 35                                             | 35                                             | 35                                                 | 35                                    |
| Defocus range [ $\mu\text{m}$ ]                                                                                                          | -0.8 to -3.0                         | -0.8 to -3.0                   | -0.8 to -3.0                                   | -0.8 to -3.0                                   | -0.8 to -3.0                                       | -0.8 to -3.0                          |
| Pixel size [ $\text{Å}$ ]                                                                                                                | 1.06                                 | 1.06                           | 1.06                                           | 1.06                                           | 1.06                                               | 1.06                                  |
| Final particles                                                                                                                          | 131,806                              | 131,806                        | 23,802                                         | 24,611                                         | 37,908                                             | 24,142                                |
| Resolution [ $\text{Å}$ ] (overall/ LSU core / LSU CP / LSU L10 region / LSU L1 stalk / SSU head / SSU body / SSU tail)                  | 2.74/2.70/2.88/3.03/3.48/-/-/-t      | 2.85/-/-/-/-/2.79/2.79/2.88    | 3.10/2.99/3.14/3.50/-/3.14/ 3.07/3.21          | 3.05/2.97/3.01/ 3.07-/3.03/ 3.03/3.10          | 2.99/2.90/3.12/ 3.14/3.48/2.94/ 2.94/3.05          | 3.03/-/-/-/-/-/-/-                    |
| Map-sharpening $B$ factor [ $\text{Å}^2$ ] (overall/ LSU core / LSU CP / LSU L10 region / LSU L1 stalk / SSU head / SSU body / SSU tail) | -50.7/-48.3/-69.6/-74.4 /-66.7/-/-/- | -51.4/-/-/-/-/48.3/-56.5/-64.7 | -41.2/-33.6/ -60.9/-55.2/-/ -50.4/-32.3/ -55.4 | -49.0/-36.8/ -46.0/-56.2/-/ -50.1/-50.1/ -57.0 | -45.8/-46.1/ -55.9/-55.9/ -66.7/-41.1/ -45.8/-61.0 | -40.3/-/-/-/-/-/-/-                   |
| <b>Model composition</b>                                                                                                                 |                                      |                                |                                                |                                                |                                                    |                                       |
| Total atoms (all atoms/ hydrogen)                                                                                                        | 223,408/97,527                       | 167,560/76,668                 | 390,797/173,689                                | 392,419/174,345                                | 394,205/175,280                                    | 207,611/91,129                        |
| Chains (RNA/ protein)                                                                                                                    | 1/44                                 | 1/35                           | 3/78                                           | 4/79                                           | 4/80                                               | 1/42                                  |
| RNA residues                                                                                                                             | 2820                                 | 1435                           | 4334                                           | 4362                                           | 4357                                               | 2529                                  |
| Protein residues                                                                                                                         | 8200                                 | 7528                           | 15553                                          | 15604                                          | 15727                                              | 7802                                  |
| Metal ions ( $\text{Mg}^{2+}$ / $\text{K}^+$ / $\text{Zn}^{2+}$ )                                                                        | 163/12/2                             | 97/22/0                        | 249/50/2                                       | 250/49/2                                       | 242/55/2                                           | 144/23/2                              |
| Ligands (ATP/ NAD/ spermine)                                                                                                             | 0/1/1                                | 1/0/0                          | 1/1/1                                          | 1/1/1                                          | 1/1/1                                              | 0/1/1                                 |
| <b>Refinement</b>                                                                                                                        |                                      |                                |                                                |                                                |                                                    |                                       |
| Model to map CC ( $\text{CC}_{\text{mask}}$ / $\text{CC}_{\text{box}}$ / $\text{CC}_{\text{peaks}}$ / $\text{CC}_{\text{volume}}$ )      | 0.86/0.76/0.73/0.84                  | 0.86/0.73/0.67/0.85            | 0.81/0.77/0.75/0.80                            | 0.83/0.78/0.77/0.82                            | 0.84/0.79/0.78/0.83                                | 0.81/0.76/0.74/0.79                   |
| Average $B$ factor [ $\text{Å}^2$ ] (protein/RNA/ metal ion and ligand/)                                                                 | 42.56/39.71/23.92                    | 36.80/36.55/31.32              | 42.75/53.92/29.43                              | 21.37/21.50/11.39                              | 27.67/29.15/18.25                                  | 17.73/25.77/15.02                     |
| RMSD bond lengths [ $\text{Å}$ ]                                                                                                         | 0.002                                | 0.002                          | 0.002                                          | 0.002                                          | 0.002                                              | 0.002                                 |
| RMSD bond angles [ $^\circ$ ]                                                                                                            | 0.382                                | 0.357                          | 0.373                                          | 0.354                                          | 0.362                                              | 0.402                                 |
| <b>Validation by MolProbity</b>                                                                                                          |                                      |                                |                                                |                                                |                                                    |                                       |
| Clash score                                                                                                                              | 1.57                                 | 2.48                           | 1.86                                           | 1.75                                           | 1.69                                               | 1.61                                  |
| Rotamer outliers [%]                                                                                                                     | 0.23                                 | 0.14                           | 0.69                                           | 0.41                                           | 0.71                                               | 0.74                                  |

|                                                                                                                       |                                     |                                      |                                                    |                                                    |                                                         |                   |
|-----------------------------------------------------------------------------------------------------------------------|-------------------------------------|--------------------------------------|----------------------------------------------------|----------------------------------------------------|---------------------------------------------------------|-------------------|
| Ramachandran plot [%] (Favored/<br>allowed/ disallowed)                                                               | 98.31/1.69/0.00                     | 98.40/1.60/0.00                      | 98.21/1.76/0.03                                    | 98.44/1.53/0.03                                    | 98.20/1.79/0.01                                         | 98.44/1.56/0.00   |
| <b>EMDB ID</b> (overall/ LSU core /<br>LSU CP / LSU L10 region / LSU<br>L1 stalk / SSU head / SSU body /<br>SSU tail) | 10973/10974/<br>10976/10975/-/-/-/- | 10958/-/-/-/-/<br>10961/10962/ 10963 | 10978/10979/10981/<br>10980~/10982/<br>10984/10983 | 10985/10986/10989/<br>10988~/10990/<br>10991/10992 | 10965/10966/10968/<br>10967/10971/10969/<br>10970/10972 | 10977/-/-/-/-/-/- |
| <b>PDB ID</b>                                                                                                         | 6YWS                                | 6YW5                                 | 6YWX                                               | 6YWY                                               | 6YWE                                                    | 6YWV              |

---

130 **Supplementary Table 2. List of RNA and proteins from mtLSU.**

| Name     | Gene   | Uniprot ID | Chain ID | Modeled            | Size | Notes                                                                                                                                                                                                                                                                                                                                                     |
|----------|--------|------------|----------|--------------------|------|-----------------------------------------------------------------------------------------------------------------------------------------------------------------------------------------------------------------------------------------------------------------------------------------------------------------------------------------------------------|
| 23S rRNA | –      | –          | A        | 2820               | 3464 | Spermine bound next to A1271.                                                                                                                                                                                                                                                                                                                             |
| uL1m     | MRPL1  | Q1K699     | e        | 59–300             | 303  | Conserved in <i>S. cerevisiae</i> and human but disordered in their structures.                                                                                                                                                                                                                                                                           |
| uL2m     | RML2   | Q7SCX7     | B        | 54–379             | 383  | Likewise its <i>S. cerevisiae</i> counterpart, NT extension locates at the subunits interface.                                                                                                                                                                                                                                                            |
| uL3m     | MRPL9  | Q1K8T6     | C        | 63–369             | 384  | A helix at CT extension is similar to the human uL3m. This extension does not exist in the <i>S. cerevisiae</i> counterpart.                                                                                                                                                                                                                              |
| uL4m     | YML6   | V5IMN1     | D        | 62–302,<br>312–324 | 325  |                                                                                                                                                                                                                                                                                                                                                           |
| uL5m     | MRPL7  | Q1K6P0     | E        | 44–352             | 352  |                                                                                                                                                                                                                                                                                                                                                           |
| uL6m     | MRPL6  | Q7RZF0     | F        | 52–252             | 255  |                                                                                                                                                                                                                                                                                                                                                           |
| bL9m     | MRPL50 | Q7S054     | G        | 52–125             | 300  |                                                                                                                                                                                                                                                                                                                                                           |
| uL10m    | MRPL11 | Q7RZ62     | f        | 54–298             | 347  | Conserved in <i>S. cerevisiae</i> and human. It is not modeled in the <i>S. cerevisiae</i> structures.                                                                                                                                                                                                                                                    |
| uL11m    | MRPL19 | Q7RX40     | g        | 12–158             | 158  | Conserved in <i>S. cerevisiae</i> and human. It is not modeled in the <i>S. cerevisiae</i> structures.                                                                                                                                                                                                                                                    |
| uL13m    | MRPL23 | Q7SBV6     | H        | 1–183              | 183  |                                                                                                                                                                                                                                                                                                                                                           |
| uL14m    | MRPL38 | Q7SBJ8     | I        | 1–46,<br>59–131    | 131  |                                                                                                                                                                                                                                                                                                                                                           |
| uL15m    | MRPL10 | Q7SB98     | J        | 47–289             | 312  |                                                                                                                                                                                                                                                                                                                                                           |
| uL16m    | MRPL16 | F5HIJ5     | K        | 61–228             | 249  |                                                                                                                                                                                                                                                                                                                                                           |
| uL17m    | MRPL8  | Q1K8C8     | L        | 2–193              | 193  | CT extension unlike its <i>S. cerevisiae</i> counterpart lacking a helix.                                                                                                                                                                                                                                                                                 |
| bL19m    | IMG1   | Q7RYW8     | M        | 41–234             | 258  |                                                                                                                                                                                                                                                                                                                                                           |
| bL21m    | MRPL49 | Q7SGE5     | N        | 85–217             | 217  |                                                                                                                                                                                                                                                                                                                                                           |
| uL22m    | MRPL22 | Q7S5N0     | O        | 43–71,<br>122–364  | 364  | NT extension extensively remodeled with respect to its <i>S. cerevisiae</i> counterpart, whereas CT extension is quite similar. NT partially occupies the position of the absent bacterial rRNA helix 24.                                                                                                                                                 |
| uL23m    | MRP20  | Q7SA60     | P        | 13–192             | 228  | CT extension remodeled respective to its <i>S. cerevisiae</i> counterpart.                                                                                                                                                                                                                                                                                |
| uL24m    | MRPL40 | Q7RXU7     | Q        | 1–353              | 396  | NT extension is a long helix that is not like its bacterial, <i>S. cerevisiae</i> , and human counterparts. CT extension is similar to that of the <i>S. cerevisiae</i> ; it covers a long distance through the surface thereby connecting different parts of the large subunit. The CT extension compensates the absence of bacterial helices 15 and 16. |
| bL27m    | MRP7   | Q1K730     | R        | 67–196,<br>248–383 | 447  | NT extension is similar to bacterial, <i>S. cerevisiae</i> and human counterparts. CT extension extensively remodeled respective to <i>S. cerevisiae</i> bL27m, and partially interacts with rRNA helix 82.                                                                                                                                               |
| bL28m    | MRPL24 | Q7SC44     | S        | 42–203,<br>209–225 | 274  | CT extension remodeled extensively respective to <i>S. cerevisiae</i> counterpart.                                                                                                                                                                                                                                                                        |
| uL29m    | MRPL4  | Q7S910     | T        | 44–223             | 263  |                                                                                                                                                                                                                                                                                                                                                           |
| uL30m    | MRPL33 | Q1K8Y7     | U        | 2–102,<br>125–161  | 161  |                                                                                                                                                                                                                                                                                                                                                           |
| bL31m    | MRPL36 | Q1K7L7     | V        | 48–128,<br>189–207 | 219  | Bridging the mtLSU CP and the mtSSU head.                                                                                                                                                                                                                                                                                                                 |
| bL32m    | MRPL32 | Q1K4P1     | W        | 64–122             | 129  | Zn ion coordination.                                                                                                                                                                                                                                                                                                                                      |
| bL33m    | MRPL39 | V5IM60     | X        | 7–54               | 59   |                                                                                                                                                                                                                                                                                                                                                           |
| bL34m    | MRPL34 | Q96U95     | Y        | 95–140             | 140  |                                                                                                                                                                                                                                                                                                                                                           |
| bL36m    | RTC6   | Q7S4E7     | 0        | 79–124             | 124  | Zn binding                                                                                                                                                                                                                                                                                                                                                |

|                     |        |            |    |                              |     |                                                                                                                                                                                            |
|---------------------|--------|------------|----|------------------------------|-----|--------------------------------------------------------------------------------------------------------------------------------------------------------------------------------------------|
| mL38                | MRPL35 | Q7RXV8     | 1  | 83–449                       | 449 | CT extension partially compensates the absence of bL35. Stabilizes helices 84-ES and 82-ES. Stabilize helices 82-ES, 84-ES, 38-ES1. NAD is binding and interacting with mL40.              |
| mL40                | MRPL28 | V5IQE0     | 2  | 248–370                      | 370 |                                                                                                                                                                                            |
| mL41                | MRPL27 | Q7S5W0     | 3  | 9–103                        | 103 | NT extension slightly remodeled respective to <i>S. cerevisiae</i> mL44. CT extension interacts with helix 0-ES1. It forms heterodimer with mL57. Interacts with helices 38-ES1 and 82-ES. |
| mL43                | MRPL51 | Q7S300     | 4  | 2–138                        | 138 |                                                                                                                                                                                            |
| mL44                | MRPL3  | Q7SA88     | 5  | 55–237,<br>273–439           | 439 |                                                                                                                                                                                            |
| mL46                | MRPL17 | Q7S1Z3     | 6  | 82–245<br>253–303<br>311–368 | 368 |                                                                                                                                                                                            |
| mL49                | IMG2   | Q7S518     | 7  | 82–165                       | 165 | Most likely interacts with helix 28.                                                                                                                                                       |
| mL50                | MRPL13 | Q7S711     | 8  | 112–442                      | 443 | Extensively remodeled. A 31 amino-acid long helix at the solvent-exposed surface of the protein. Interacting with helices 45 and 46.                                                       |
| mL53                | MRPL44 | Q7SGH0     | h  | 1–98                         | 98  | Conserved in <i>S. cerevisiae</i> and human. It is not modeled in the <i>S. cerevisiae</i> structures.                                                                                     |
| mL54                | MRPL37 | Q7SCZ3     | i  | 77–118,<br>137–218           | 218 | Bridges L10/L11 area to CP. Conserved in <i>S. cerevisiae</i> and human. It is not modeled in the <i>S. cerevisiae</i> structures and only one helix is modeled in the human structures.   |
| mL57                | MRPL15 | Q7S1R6     | 9  | 61–266                       | 267 | Forms a heterodimer with mL44. Stabilizes helix 0-ES1.                                                                                                                                     |
| mL58                | MRPL20 | Q1K6U7     | a  | 41–103,<br>128–225           | 225 | Interacts with helix 0.                                                                                                                                                                    |
| mL59                | MRPL25 | A0A0B0DMU6 | b  | 2–162                        | 162 | Similar to its <i>S. cerevisiae</i> counterpart with slight remodeling at NT and CT extensions. Conserved but not modeled in <i>S. cerevisiae</i> .                                        |
| mL60                | MRPL31 | U9W8F2     | c  | 13–110                       | 110 |                                                                                                                                                                                            |
| mL67                | MHR1   | Q7RYM5     | d  | 33–218<br>243–291            | 292 |                                                                                                                                                                                            |
| mL108               | MRPL49 | Q7RWZ7     | j  | 2-196                        | 201 |                                                                                                                                                                                            |
| Nascent polypeptide | –      | –          | cc | 7                            |     |                                                                                                                                                                                            |

132 **Supplementary Table 3. List of RNA and proteins from mtSSU.**

| MRP      | Gene   | Uniprot ID | Chain ID | Modeled                                                           | Size | Notes                                                             |
|----------|--------|------------|----------|-------------------------------------------------------------------|------|-------------------------------------------------------------------|
| 16S rRNA | –      | –          | aa       | 1435                                                              | 1864 |                                                                   |
| bS1m     | MRP51  | A7UWX2     | AA       | 5–124,<br>132–213,<br>229–269,<br>288–337,<br>341–358,<br>368–430 | 470  |                                                                   |
| uS2m     | MRP4   | V5ILE0     | BB       | 107–396                                                           | 428  |                                                                   |
| uS3m     | VAR1   | P23351     | CC       | 17–171,<br>193–369,<br>403–508                                    | 508  |                                                                   |
| uS4m     | NAM9   | Q7SA90     | DD       | 1–215,<br>379–453                                                 | 453  |                                                                   |
| uS5m     | MRPS5  | Q1K548     | EE       | 56–180,<br>236–477                                                | 477  | Has a unique insertion to form a unique second beak.              |
| bS6m     | MRP17  | Q7SB95     | FF       | 1–117                                                             | 117  |                                                                   |
| uS7m     | RSM7   | Q7S6M9     | GG       | 87–309                                                            | 309  |                                                                   |
| uS8m     | MRPS8  | Q7SHF3     | HH       | 2–161                                                             | 161  |                                                                   |
| uS9m     | MRPS9  | Q7S7R6     | II       | 69–315                                                            | 315  |                                                                   |
| uS10m    | RSM10  | Q7RYL4     | JJ       | 81–268                                                            | 268  |                                                                   |
| uS11m    | MRPS18 | Q7SGU0     | KK       | 253–376                                                           | 376  |                                                                   |
| uS12m    | MRPS12 | Q7S9I4     | LL       | 45–172                                                            | 174  |                                                                   |
| uS13m    | SWS2   | Q7S2C2     | MM       | 2–119                                                             | 119  |                                                                   |
| uS14m    | MRP2   | Q7SF85     | NN       | 2–113                                                             | 113  |                                                                   |
| uS15m    | MRPS28 | Q1K5G1     | OO       | 38–106,<br>114–320                                                | 320  |                                                                   |
| bS16m    | MRPS16 | P08580     | PP       | 2–99                                                              | 107  |                                                                   |
| uS17m    | MRPS17 | Q7S4E0     | QQ       | 6–163                                                             | 165  | A unique C-terminal helix, which binds the IF <sub>1</sub> dimer. |
| bS18m    | RSM18  | Q1K8E0     | RR       | 108–241                                                           | 256  |                                                                   |
| uS19m    | RSM19  | Q1K8V2     | SS       | 9–89                                                              | 91   |                                                                   |
| bS21m    | MRP21  | Q7SAJ1     | TT       | 149–236                                                           | 236  |                                                                   |
| mS23     | RSM25  | F8MRK5     | UU       | 2–128,<br>142–238                                                 | 240  |                                                                   |
| mS26     | PET123 | Q7SHR9     | VV       | 47–257,<br>262–287,<br>293–316                                    | 316  |                                                                   |



|                     |                |        |        |                    |     |                                                                                                                                                                                            |
|---------------------|----------------|--------|--------|--------------------|-----|--------------------------------------------------------------------------------------------------------------------------------------------------------------------------------------------|
| mS27                | MRP13          | Q7RYW7 | WW     | 40–270,<br>275–396 | 396 | Corresponds to mS27 in human. <i>S. cerevisiae</i> mS44 and the unknown B (PDB ID: <a href="#">5MRC</a> ) are one connected protein, which corresponds to human and <i>N. crassa</i> mS27. |
| mS29                | RSM23<br>/DAP3 | Q7SD06 | XX     | 57–66,<br>72–469   | 469 | DAP3 death associated protein 3. ATP and Mg ion are bound.                                                                                                                                 |
| mS33                | RSM27          | Q1K5R0 | YY     | 2–100              | 108 |                                                                                                                                                                                            |
| mS35                | RSM24          | Q1K5Z0 | ZZ     | 42–353             | 382 | Has a unique N-terminal domain to form a unique beak.                                                                                                                                      |
| mS37                | MRP10          | Q7S4Y4 | 11     | 2–89               | 90  |                                                                                                                                                                                            |
| mS38                | COX24          | Q7SHR6 | 22     | 312–344            | 344 |                                                                                                                                                                                            |
| mS41                | FYV4           | Q1K6Q3 | 33     | 43–235             | 236 |                                                                                                                                                                                            |
| mS42                | RSM27<br>/MRP1 | Q7S2H6 | 44, 55 | 43–302             | 310 | Homolog of Fe superoxide dismutase. Lost the catalytic Fe ion binding side. Two chains form a homodimer, in contrast to the mS42-mS43 heterodimer in <i>S. cerevisiae</i> .                |
| mS45                | MRPS35         | Q7SHB2 | 66     | 66–348             | 348 |                                                                                                                                                                                            |
| mS46                | RSM28          | Q7SG49 | 77     | 223–401            | 414 |                                                                                                                                                                                            |
| mS47                | MRP5<br>/EHD3  | Q1K7A4 | 88     | 42–508             | 508 | 3-hydroxyisobutyryl-CoA hydrolase. Probably an active enzyme because its active site is conserved.                                                                                         |
| ATP-IF <sub>1</sub> | INH1           | V5IRA3 | 00, 99 | 39–86              | 95  | ATP synthase inhibitor 1. Forms a homodimer located in the mtSSU tail region.                                                                                                              |
| tRNA                | –              | –      | bb     | 73                 |     | P, E or P/E tRNA state. The density is an average of different tRNA species.                                                                                                               |
| mRNA                | –              | –      | ee     | 11                 |     | mRNA in the P and P/E state. The density is an average of different mRNAs.                                                                                                                 |

133

## 134 Supplementary References

135 1 Cabezon, E., Runswick, M. J., Leslie, A. G. & Walker, J. E. The structure of bovine IF(1), the  
 136 regulatory subunit of mitochondrial F-ATPase. *EMBO J* **20**, 6990-6996,  
 137 doi:10.1093/emboj/20.24.6990 (2001).

138 2 Bason, J. V., Montgomery, M. G., Leslie, A. G. & Walker, J. E. Pathway of binding of the  
 139 intrinsically disordered mitochondrial inhibitor protein to F1-ATPase. *Proc Natl Acad Sci U*  
 140 *S A* **111**, 11305-11310, doi:10.1073/pnas.1411560111 (2014).

141
